# Supplementary material for: The growth mechanism of zinc oxide and hydrozincite: a study using electron microscopies and in situ SAXS
Source: Royal Society of Chemistry journal article supplement (doi:10.1039/c2ce06134a), 2012-01-01
Supplement: c2ce06134a.pdf [file c2ce06134a.pdf]

## Electronic Supplementary Information

# The growth mechanism of zinc oxide and hydrozincite: a study using electron microscopy and in-situ SAXS

Marko Bitenc<sup>a,b</sup>, Peter Podbršček<sup>a</sup>, Pavo Dubček<sup>c</sup>, Sigrid Bernstorff<sup>d</sup>, Goran Dražić<sup>e</sup>, Bojan Orel<sup>f</sup>, Zorica Crnjak Orel<sup>a,b</sup>

<sup>a</sup> National Institute of Chemistry Slovenia, Hajdrihova 19, SI-1001, Slovenia Ljubljana. Fax: +386 1 476 0300; Tel: +386 1 476 0236; E-mail: [zorica.crnjak.orel@ki.si](mailto:zorica.crnjak.orel@ki.si)

<sup>b</sup> Centre of Excellence for Polymer Materials and Technologies, Tehnološki park 24, 1000 Ljubljana, Slovenia.

<sup>c</sup> Materials Research Dept., Ruđer Bošković Institute, P.O. Box 180, 10002, Zagreb Croatia.

<sup>d</sup> Sincrotrone Trieste, S.C.p.A., I-34012 Basovizza TS, Italy.

<sup>e</sup> Jožef Stefan Institute, Jamova 39, SI-1000, Ljubljana, Slovenia.

<sup>f</sup> Faculty of Computer and Information Science, University of Ljubljana, Tržaška cesta 25, SI-1000, Ljubljana, Slovenia.

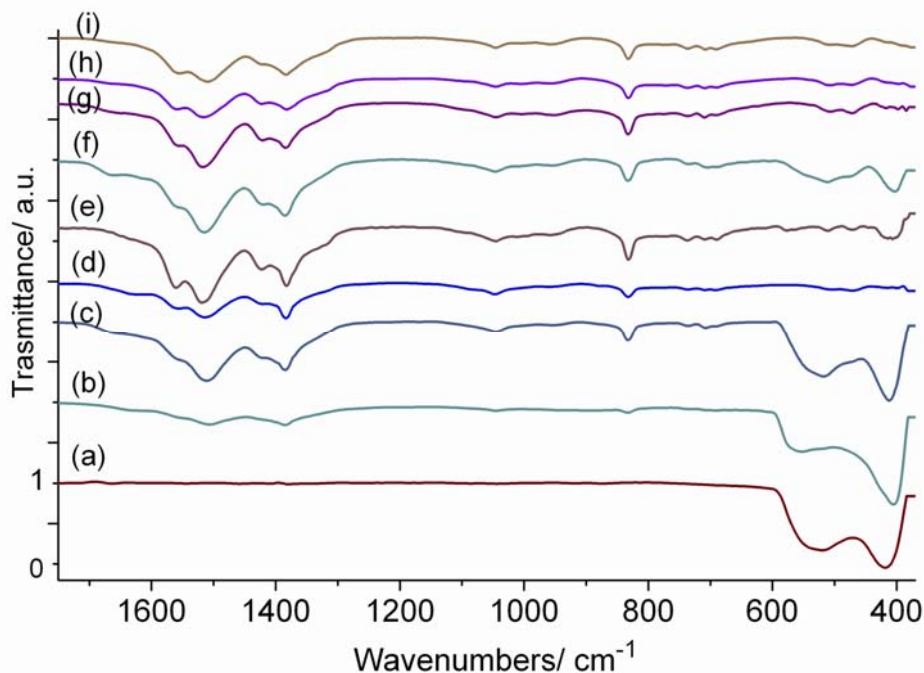

ESI Figure 1: FTIR spectra of: (a) – Sample A2, (b) – Sample A3, (c) – Sample B2, (d) – Sample B3, (e) – Sample C1, (f) – Sample C2, (g) – Sample D1, (h) – Sample D2 and (i) – Sample D3.

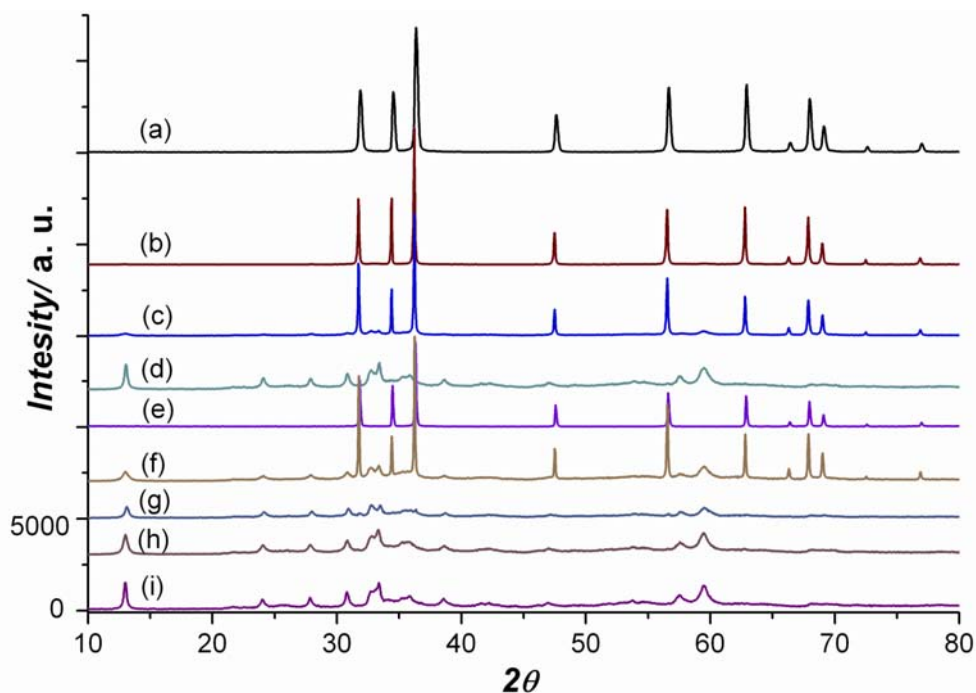

ESI Figure 2: XRD spectra of: (a) – Sample A2, (b) – Sample A3, (c) – Sample B2, (d) – Sample B3, (e) – Sample C1, (f) – Sample C2, (g) – Sample D1, (h) – Sample D2 and (i) – Sample D3.

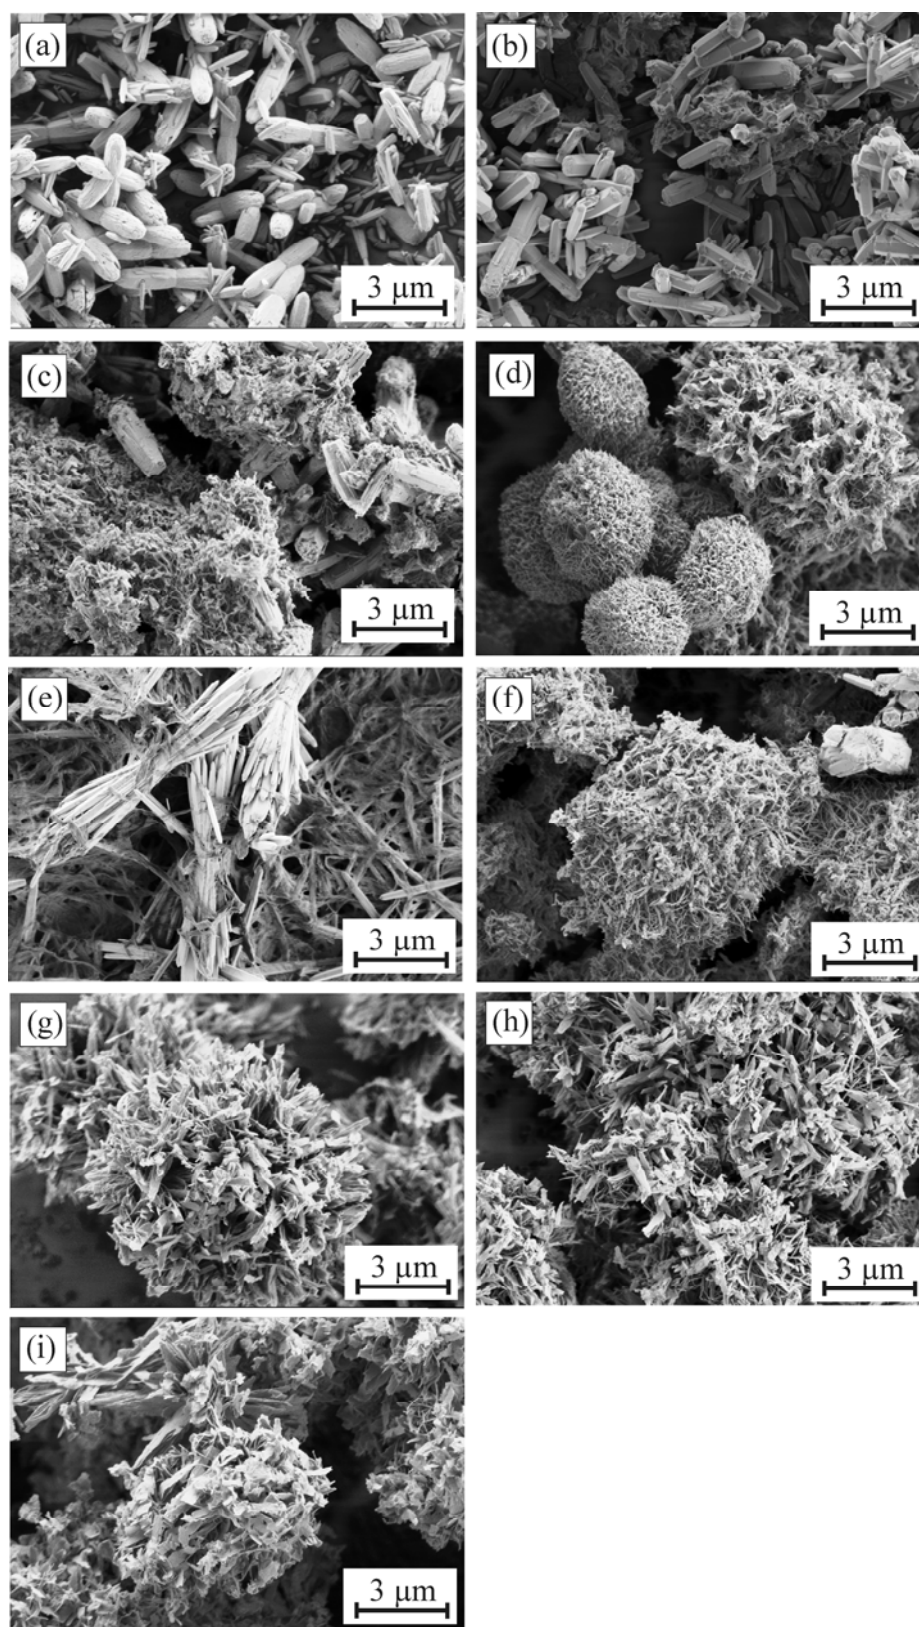

ESI Figure 3: FE-SEM micrographs of the samples morphology after 2 hours of synthesis: (a) – Sample A2, (b) – Sample A3 and (c) – Sample B2, (d) – Sample B3, (e) – Sample C1, (f) – Sample C2, (g) – Sample D1, (h) – Sample D1 and (i) – Sample D3.



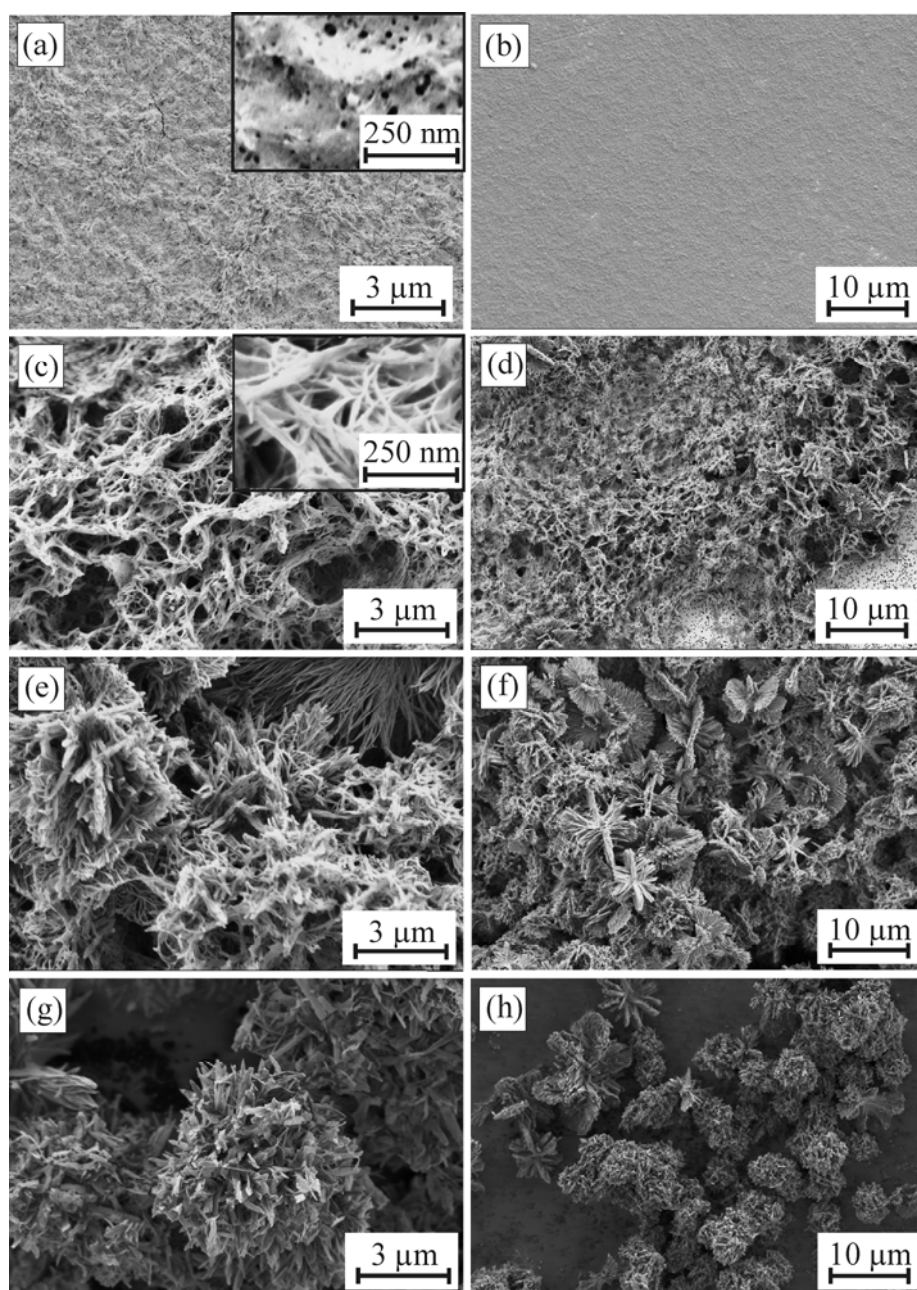

ESI Figure 4: FE-SEM micrographs of Sample D3 (Zn 0.05 M, urea 0.25 M, water) after various reaction times: (a, b) – 30 min, (c, d) – 45 min, (e, f) – 60 min and (g, h) – 90 min.
